# Supplementary material for: CKD After 225Ac-PSMA617 Therapy in Patients With Metastatic Prostate Cancer
Source: PubMed Central journal article supplement — Kidney Int Rep. 2020 Dec 24;6(3):853–6. doi: 10.1016/j.ekir.2020.12.006 (PMC7938068; doi:10.1016/j.ekir.2020.12.006), 2020-12-24
Supplement: mmc1.pdf [file mmc1.pdf]

### Supplementary References

- S1. Silver DA, Pellicer I, Fair WR, et al., Prostate-specific membrane antigen expression in normal and malignant human tissues. *Clin Cancer Res.* 1997;3:81-85.
- S2. Kratochwil C, Bruchertseifer F, Rathke H, et al., Targeted alpha-Therapy of Metastatic Castration-Resistant Prostate Cancer with (225)Ac-PSMA-617: Dosimetry Estimate and Empiric Dose Finding. *J Nucl Med.* 2017;58:1624-1631.
